# Supplementary material
Source: publisher figshare collection journal article supplement (https://future-science-group.figshare.com/ndownloader/files/33851516)
Supplement: Supplementary file 1 [file 33851516]

Supplementary Material 6 Facility parameters

| Facility type, | Contract | Newbuild | | | |
| --- | --- | --- | --- | --- | --- |
| Facility scale, | Pilot | Pilot | Small | Medium | Large |
| Floorspace, (m2) | N/A | 120 | 300 | 1000 | 3000 |
| Support floorspace, (m2) | N/A | 30 | 120 | 250 | 600 |
| Core equipment floorspace, (m2) | N/A | 42 | 42 | 84 | 168 |
| QC floorspace, (m2) | N/A | 25 | 25 | 25 | 50 |
| Support equipment cost,  (thousand USD) | N/A | 280 | 300 | 350 | 400 |
| Core equipment cost, (thousand USD) | N/A | 510 | 630 | 660 | 800 |
| QC equipment cost, (thousand USD) | N/A | 421 | 421 | 842 | 1684 |
| Contract negotiation costs, (thousand USD) | 25 | N/A | N/A | N/A | N/A |
| Facility Investment cost, (thousand USD) | N/A | 2800 | 6000 | 12000 | 20000 |
| Set-up time, (years) | 0.5 | 2 | 3 | 3.5 | 4 |
| Equipment # (Simple),  Equipment # (Complex), | 5  3 | N/A | N/A | N/A | N/A |
| Facility fixed cost (thousand USD) | 25 | 100 | 150 | 200 | 300 |
| Outsource penalty cost multiplier () | 1.2 | N/A | N/A | N/A | N/A |
| Scale penalty multiplier () | 1.2 | 1.2 | 1.15 | 1.1 | 1 |
